# Supplementary material for: Impact of HIV coinfection on tuberculosis treatment outcomes in Ethiopia: a systematic review and meta-analysis
Source: PubMed Central journal article supplement — BMJ Open. 2024 Jul 5;14(7):e087218. doi: 10.1136/bmjopen-2024-087218 (PMC11228389; doi:10.1136/bmjopen-2024-087218), 2024-07-05
Supplement: bmjopen-2024-087218supp002.pdf [file bmjopen-2024-087218supp002.pdf]

**Advanced PubMed and Web of Science databases searching strategy:**

((((((((((Impact [All Fields]) OR (effect [All Fields])) AND (HIV co-infection [All Fields])) OR (human immunodeficiency virus co-infection [All Fields])) OR (HIV/AIDS co-infection [All Fields])) AND (TB treatment outcomes [All Fields])) OR (tuberculosis treatment outcomes [All Fields])) OR (multi-drug resistance tuberculosis treatment outcomes [All Fields])) OR (MDR-TB treatment outcomes [All Fields])) OR (MDR-tuberculosis treatment outcomes [All Fields])) OR (unsuccessful TB treatment outcomes [All Fields])) OR (unsuccessful tuberculosis treatment outcome [All Fields])) AND (Ethiopia [All Fields])).

**Google scholar searching strategy:**

“Impact” AND “HIV co-infection” OR “TB/HIV co-infection” AND “tuberculosis treatment outcomes” OR “successful tuberculosis treatment outcome” OR “unsuccessful tuberculosis treatment outcome” AND “Ethiopia”.

**Filters and limits used:**

Article type: Observational studies

Text availability: Full text

Article language: Articles only published in English language

Publication date: no restriction
