# Supplementary material for: Impact of HIV coinfection on tuberculosis treatment outcomes in Ethiopia: a systematic review and meta-analysis
Source: PubMed Central journal article supplement — BMJ Open. 2024 Jul 5;14(7):e087218. doi: 10.1136/bmjopen-2024-087218 (PMC11228389; doi:10.1136/bmjopen-2024-087218), 2024-07-05
Supplement: bmjopen-2024-087218supp004.pdf [file bmjopen-2024-087218supp004.pdf]

Supplementary table 1: Characteristics of the included studies to estimate the pooled success of TB treatment among patients living with HIV co-infection in Ethiopia

| Author         | Pub. Year | Region | Objectives                                                                                                             | Study design                  | Study duration | Sampling technique | Sample size | Prevalence (%) | Effect measure | OR/RR/HR | JBI score |
|----------------|-----------|--------|------------------------------------------------------------------------------------------------------------------------|-------------------------------|----------------|--------------------|-------------|----------------|----------------|----------|-----------|
| Melese A et al | 2016      | Amhara | To assess the treatment outcomes and its associated factors among TB patients                                          | Retrospective Cohort          | 2008-2013      | Consecutive        | 43          | 85.4           | OR             | 1.4      | 5         |
| Esmael A et al | 2014      | Amhara | To analyze the specific reasons for unsuccessful TB treatment outcome                                                  | Retrospective Cohort          | 2008-2013      | Consecutive        | 321         | 57.3           | OR             | 1.0      | 6         |
| Beza MG et al  | 2013      | Amhara | To investigate the outcome of tuberculosis treatment                                                                   | Cross-sectional               | 2008-2013      | Consecutive        | 180         | 37.2           | OR             | 2.8      | 5         |
| Malede A et al | 2015      | Amhara | To determine treatment outcome of TB patients and risk factors for poor treatment outcome                              | Retrospective cross-sectional | 2010-2012      | Consecutive        | 584         | 81.5           | OR             | 2.7      | 5         |
| Biruk M et al  | 2016      | Amhara | To assess the outcome of tuberculosis treatment and to identify factors associated with tuberculosis treatment outcome | Cross-sectional               | 2008-2012      | Consecutive        | 212         | 49.5           | OR             | 2.2      | 5         |

|                           |      |        |                                                                                                                                                |                      |           |             |     |      |    |     |   |
|---------------------------|------|--------|------------------------------------------------------------------------------------------------------------------------------------------------|----------------------|-----------|-------------|-----|------|----|-----|---|
| Sinshaw Y et al           | 2017 | Amhara | To assessed the successful TB treatment outcomes and its associated factors among TB/HIV co-infected patients                                  | Cross-sectional      | 2010-2016 | -           | 308 | 77.3 | OR | --  | 5 |
| Getie A et al             | 2020 | Amhara | To assess tuberculosis treatment outcomes and associated factors                                                                               | Cross-sectional      | 2015-2018 | Consecutive | 50  | 64   | OR | 3.0 | 6 |
| Mekonnen D et al          | 2016 | Amhara | To explore the profile and treatment outcomes of patients with tuberculosis                                                                    | Cross-sectional      | 2011-2014 | Consecutive | 227 | 82.8 | OR | 2.5 | 5 |
| Jemal M et al             | 2015 | Amhara | To evaluate treatment outcomes and to determine predictors for unsuccessful treatment outcomes                                                 | Retrospective Cohort | 2009-2012 | Consecutive | 598 | 61.2 | OR | 2.1 | 5 |
| Gerbreegz iabher SB et al | 2016 | Amhara | To assess trends of TB case notifications, treatment success rate and factors associated with unsuccessful treatment outcome among TB patients | Retrospective Cohort | 2007-2012 | Consecutive | 589 | 86.1 | OR | --  | 5 |
| Berihun YA et al          | 2018 | Amhara | To assess the prevalence of tuberculosis and treatment outcomes of patients with tuberculosis                                                  | Cross-sectional      | 2010-2015 | Consecutive | 6   | 66.6 | OR | 0.2 | 6 |
| Ejeta E et al             | 2015 | Oromia | To assess the treatment outcome and its associated risk factors among TB cases attending DOTS clinics                                          | Retrospective Cohort | 2009-2013 | Consecutive | 201 | 60.7 | OR | 3.7 | 5 |
| Abebe et al               | 2015 | Oromia | To assess treatment outcome and associated factors among tuberculosis patients                                                                 | Retrospective Cohort | 2008-2012 | Consecutive | 161 | 55.9 | OR | 7.9 | 6 |

|                 |      |                                         |                                                                                                                                                                                     |                      |                    |               |     |      |    |      |   |
|-----------------|------|-----------------------------------------|-------------------------------------------------------------------------------------------------------------------------------------------------------------------------------------|----------------------|--------------------|---------------|-----|------|----|------|---|
| Tesema T et al  | 2020 | Oromia                                  | To identify the determinants of tuberculosis treatment outcome under directly observed treatment short courses                                                                      | Cross-sectional      | Mar 2016-Dec 2016. | Consecutive   | 35  | 31.4 | OR | 16.2 | 5 |
| Ketema K et al  | 2014 | Oromia                                  | To investigate the effect of decentralised care on anti-tuberculosis treatment outcomes and identify factors affecting outcome among new smear-positive tuberculosis (TB) patients. | Retrospective Cohort | 2010-2012          | Consecutive   | 211 | 82.9 | OR | 4.4  | 5 |
| Garedew Det al  | 2017 | Oromia                                  | To assess treatment outcome of tuberculosis and its associated factors                                                                                                              | Cross-sectional      | 2011-2014          | Consecutive   | 34  | 76.5 | OR | 14.3 | 5 |
| Dedefo MG et al | 2019 | Oromia                                  | To assess treatment outcomes of tuberculosis retreatment case and Its determinants                                                                                                  | Cross-sectional      | 2014-2017          | Consecutive   | 65  | 72.3 | OR | 1.18 | 6 |
| Asres A et al   | 2016 | Southern nation, nationality and people | To compare the treatment outcomes among those TB patients treated with the 4RH and 6EH continuation phase treatment regimens                                                        | Cross-sectional      | 2008-2014          | Simple random | 97  | 83.1 | OR | 1.8  | 6 |
| Ayele B et al   | 2015 | Southern nation, nationality and people | To assess trends in the expansion of DOTS and treatment outcomes for tuberculosis                                                                                                   | Retrospective Cohort | 2009-2014          | Consecutive   | 499 | 61.5 | RR | 1.9  | 5 |
| Fiseha T et al  | 2015 | Southern nation, nationality and people | To assess the tuberculosis treatment outcome among HIV co-infected patients                                                                                                         | Cross-sectional      | 2010-2013          | Consecutive   | 397 | 28.9 | -- | --   | 7 |

|                      |      |                                         |                                                                                                        |                      |           |             |     |      |    |      |   |
|----------------------|------|-----------------------------------------|--------------------------------------------------------------------------------------------------------|----------------------|-----------|-------------|-----|------|----|------|---|
| Gbremariam G et al   | 2016 | Southern nation, nationality and people | To investigate the impact of HIV status on treatment outcome of tuberculosis patients                  | Retrospective Cohort | 2008-2014 | Consecutive | 156 | 87.3 | OR | 5.06 | 5 |
| Teferi et al MY      | 2021 | Southern nation, nationality and people | To assess TB treatment outcome and associated factors among TB patients                                | Retrospective Cohort | 2014-2019 | Consecutive | 39  | 79.4 | OR | 1.5  | 5 |
| Berhe G et al        | 2012 | Tigray                                  | To investigate tuberculosis treatment outcomes and predictors for unsuccessful treatment outcomes      | Cross-sectional      | 2009-2011 | Consecutive | 35  | 80   | OR | 2.0  | 5 |
| Belayneh M et al     | 2015 | Tigray                                  | To analyze the treatment outcome of human immunodeficiency virus and tuberculosis co-infected patients | Cross-sectional      | 2009-2011 | Systematic  | 342 | 71   | -- | --   | 5 |
| Mirutse G et al      | 2019 | Tigray                                  | To assess the treatment outcome of tuberculosis patients                                               | Retrospective Cohort | 2007-2016 | Consecutive | 596 | 89.9 | -- | --   | 6 |
| Tola A et al         | 2019 | Harari                                  | To assess treatment outcome of tuberculosis and associated factors among TB-HIV Co-infected patients   | Cross-sectional      | 2012-2017 | Systematic  | 349 | 86.8 |    | --   | 7 |
| Weldegebreal F et al | 2018 | Harari                                  | To assess treatment outcome of tuberculosis among Human Immunodeficiency Virus positive patients       | Cross-sectional      | 2008-2014 | Consecutive | 627 | 78.3 |    | --   | 6 |

|                 |      |                      |                                                                                                                                                       |                      |                   |               |     |      |    |      |   |
|-----------------|------|----------------------|-------------------------------------------------------------------------------------------------------------------------------------------------------|----------------------|-------------------|---------------|-----|------|----|------|---|
| Fentie AM et al | 2020 | Addis Ababa          | To assess tuberculosis treatment outcomes among patients                                                                                              | Cross-sectional      | 2014-2018         | Consecutive   | 42  | 73.8 | OR | 12.1 | 5 |
| Ali SA et al    | 2016 | Addis Ababa          | To assess and explain the outcomes of TB treatment in TB patients with respect to their HIV status, and to identify its associated underlying factors | Cross-sectional      | Jan 2013-Dec 2013 | Random        | 169 | 88.2 | OR | 1.9  | 6 |
| Tola HH et al   | 2019 | Addis Ababa          | To analyze intermittent treatment interruption and its effect on multidrug resistant tuberculosis treatment outcome                                   | Retrospective Cohort | 2010-2019         | Simple random | 84  | 57.1 | RR | 1.8  | 6 |
| Asebe G et al   | 2015 | Gambella             | To assess the treatment outcome of tuberculosis patients                                                                                              | Cross-sectional      | 2011-2013         | Consecutive   | 280 | 66   | OR | 1.4  | 6 |
| Zenebe T et al  | 2016 | Afar                 | To assess tuberculosis treatment outcome and associated factors among smear-positive pulmonary tuberculosis patients                                  | Cross-sectional      | 2011-2013         | Consecutive   | 61  | 63.9 | OR | 3.2  | 6 |
| Meressa D et al | 2015 | Addis Ababa & Amhara | To report factors associated with successful multidrug-resistant TB (MDR TB) treatment outcomes in a highly resource constrained setting in Africa    | Cohort               | 2012-2014         | Consecutive   | 133 | 69.9 | HR | 1.8  | 6 |
| Habte D et al   | 2020 | Amhara and Oromia    | To assess the childhood TB TSRs and associated factors in two major agrarian regions of Ethiopia                                                      | Retrospective Cohort | 2012-2014         | Consecutive   | 178 | 88.2 | OR | 2.7  | 5 |
