# Supplementary figures and images for: Impact of HIV coinfection on tuberculosis treatment outcomes in Ethiopia: a systematic review and meta-analysis
Source: PubMed Central journal article supplement — BMJ Open. 2024 Jul 5;14(7):e087218. doi: 10.1136/bmjopen-2024-087218 (PMC11228389; doi:10.1136/bmjopen-2024-087218), 2024-07-05

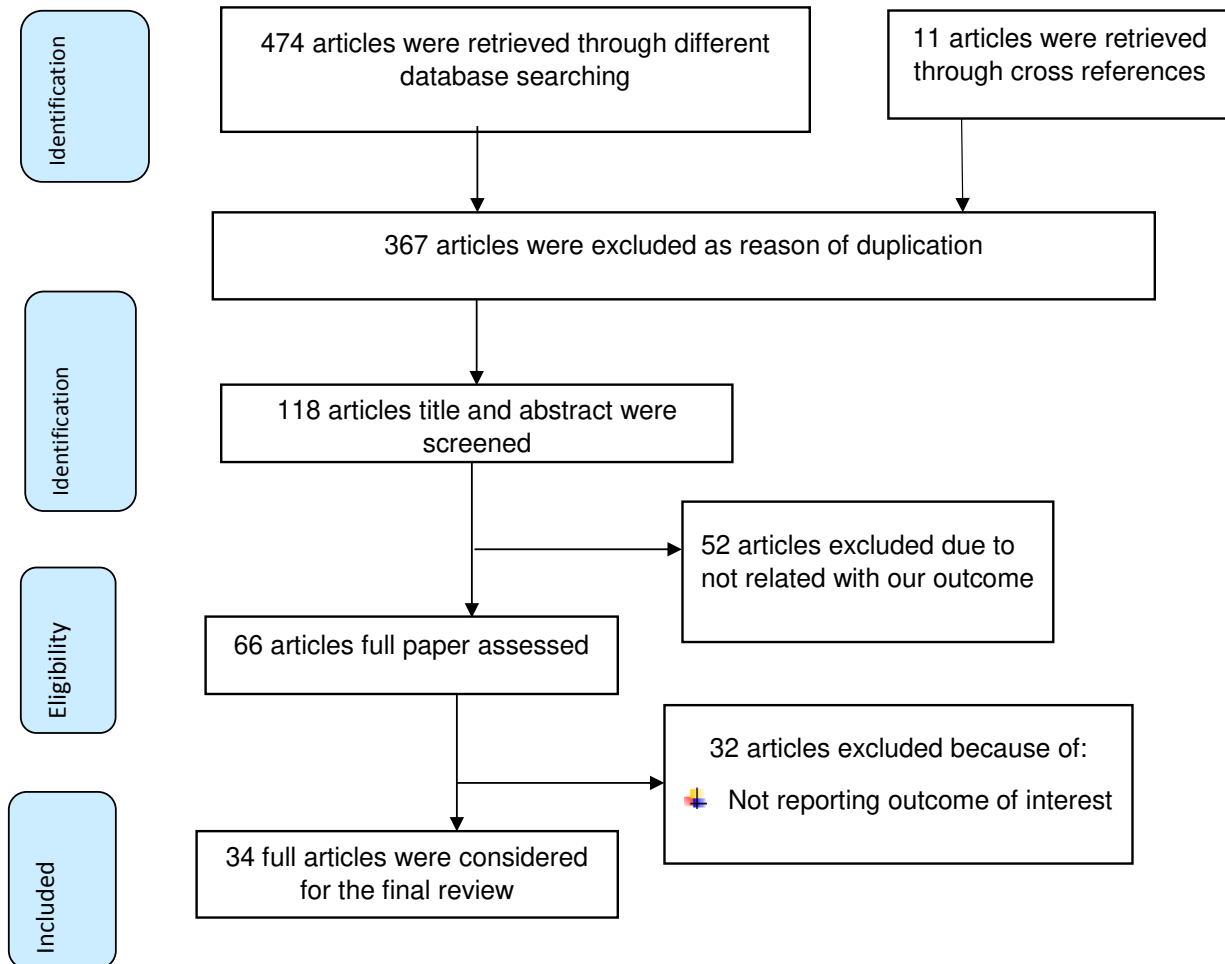

Supplement: bmjopen-2024-087218supp003.pdf [file bmjopen-2024-087218supp003.pdf]
